# Supplementary material
Source: PubMed Central journal article supplement (PMC527149)
Supplement: plntphys_136_3_3486__3.pdf [file plntphys_136_3_3486__3.pdf]

---

**Supplemental Table II.** *Transposable elements fragments found in maize NB mtDNA*

---

| Size | NB Coordinates  | TIGR classification             | Name            |
|------|-----------------|---------------------------------|-----------------|
| 227  | 473,615-473,841 | <i>Triticum</i> retrotransposon | sabrina 11561   |
| 152  | 71,279-71,430   | <i>Oryza</i> retrotransposon    | gypsy bx34e     |
| 152  | 171,899-172,050 | <i>Oryza</i> retrotransposon    | gypsy bx34e     |
| 60   | 256,985-257,045 | <i>Triticum</i> retrotransposon | latidu 258C22-1 |
| 50   | 391,058-391,107 | <i>Oryza</i> retrotransposon    | Osr3-1          |

---

The TIGR grass transposable element database was used as the source of element sequences (see Methods).

---
